# Supplementary material for: Scalable room-temperature synthesis of plum-pudding-like Cs4PbBr6/CsPbBr3 microcrystals exhibiting excellent photoluminescence
Source: Royal Society of Chemistry journal article supplement (doi:10.1039/c9tc00604d), 2019-01-01
Supplement: c9tc00604d1.pdf [file c9tc00604d1.pdf]

## Supporting Information

### Scalable Room-Temperature Synthesis of $\text{Cs}_4\text{PbBr}_6/\text{CsPbBr}_3$ Microcrystals Exhibiting Excellent Photoluminescence

Guomiao Hu,<sup>#ab</sup> Wenjing Qin,<sup>\*#ab</sup> Manman Liu,<sup>ab</sup> Xiaoxue Ren,<sup>ab</sup> Xiaoming Wu,<sup>ab</sup> Liying Yang<sup>ab</sup> and Shougen Yin<sup>\*ab</sup>

<sup>a</sup>. School of Materials Science and Engineering, Tianjin University of Technology, Tianjin 300384, People's Republic of China

<sup>b</sup>. Tianjin Key Laboratory for Photoelectric Materials and Devices, Tianjin University of Technology, Tianjin 300384, People's Republic of China

\* Corresponding authors.

E-mail: [wjqin@tjut.edu.cn](mailto:wjqin@tjut.edu.cn); [sgyin@tjut.edu.cn](mailto:sgyin@tjut.edu.cn)

#These authors contributed equally to this work.

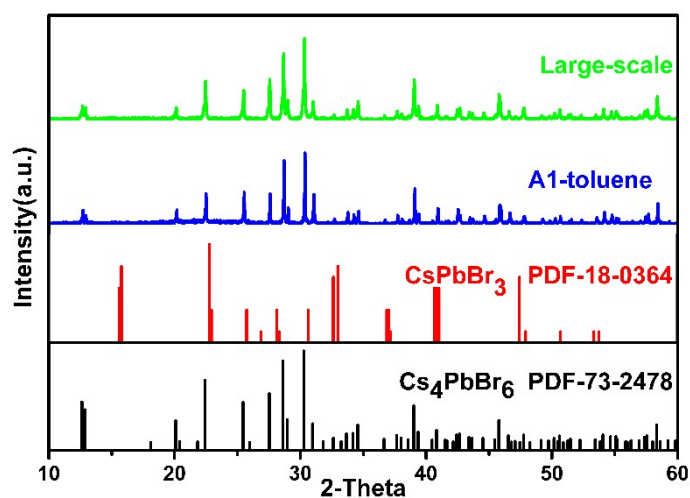

Figure S1: XRD patterns of A1 from laboratory-scale and large-scale preparations compared to those of  $\text{CsPbBr}_3$  and  $\text{Cs}_4\text{PbBr}_6$ .

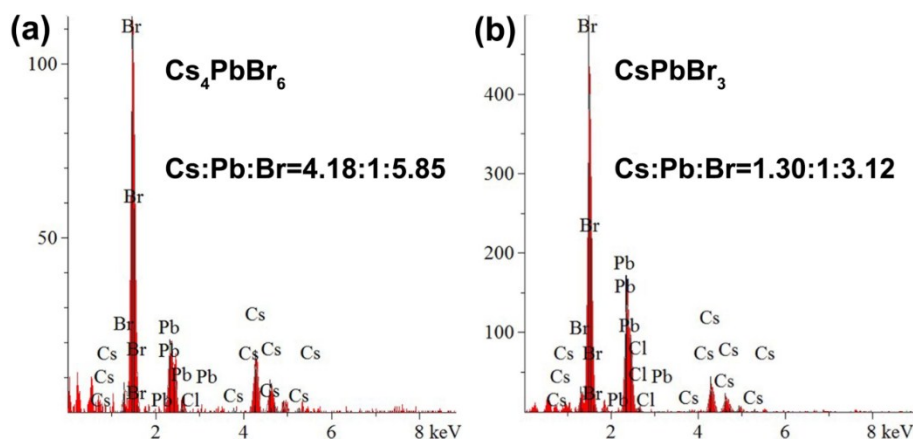

Figure S2: EDS patterns of (a) A1 and (b) A5.

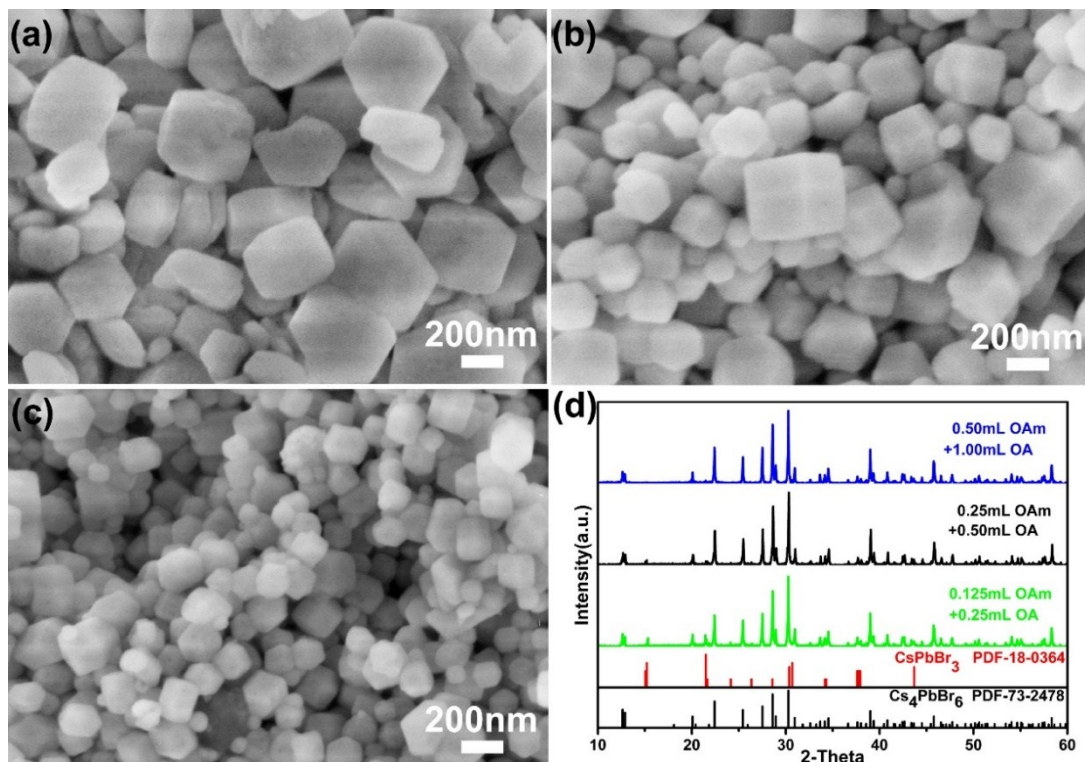

**Figure S3:** SEM images of MCs prepared with different amounts of ligands: (a) 0.125 mL of OAm and 0.25 mL of OA, (b) 0.25 mL of OAm and 0.5 mL of OA, and (c) 0.50 mL of OAm and 1 mL of OA. (d) Corresponding XRD patterns.

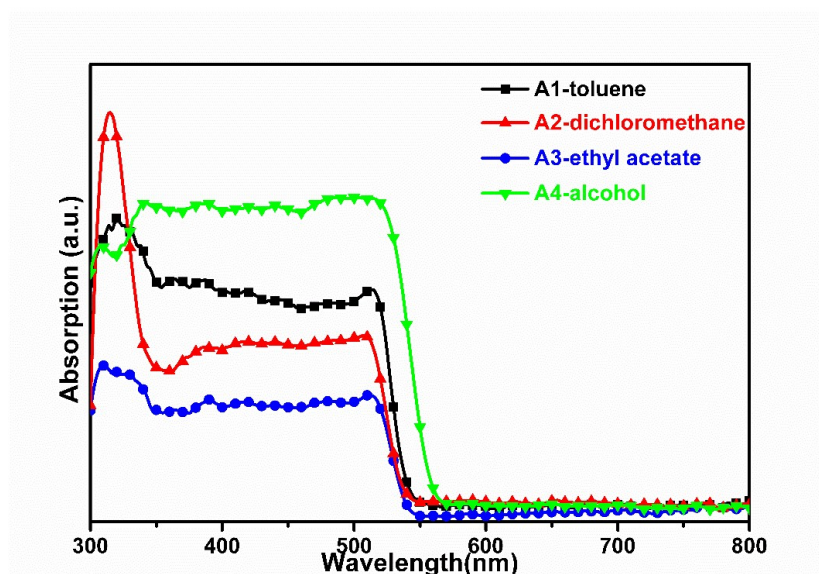

**Figure S4:** Steady-state absorption spectra of A1–A4.

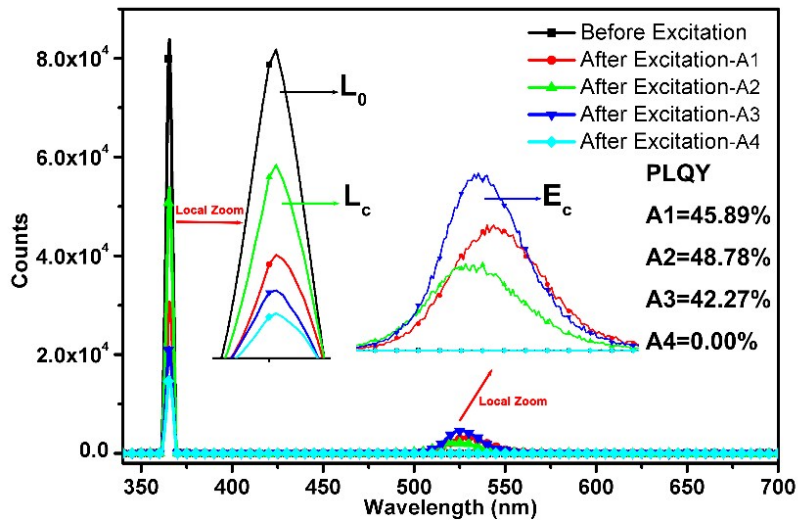

Figure S5: The PLQY of the MCs prepared with different antisolvents: toluene (A1), dichloromethane (A2), ethyl acetate (A3), and alcohol (A4).

$L_0$ : Spectral integral area of incident light before excitation

$L_c$ : Spectral integral area of incident light after excitation

$E_c$ : Spectral integral area of emitted light after excitation

Number of photons absorbed =  $L_0 - L_c$

Number of photons emitted =  $E_c$

$$\text{PLQY} = \frac{\text{Number of photons emitted}}{\text{Number of photons absorbed}} = \frac{E_c}{L_0 - L_c}$$
